# Supplementary material for: The History of Domesticated Dogs in the Americas
Source: Preprints.org preprint supplement (doi:10.20944/preprints202008.0453.v1), 2020-08-20
Supplement: Supplementary file 1 [file supplementary]

**The history of domesticated dogs in the Americas Supplementary Materials**

V. Segura 1, ORCID: 0000-0002-0307-4975

Email: [vseguragago@gmail.com](mailto:vseguragago@gmail.com)

Madeleine Geiger 2, ORCID: 0000-0002-8405-6663

Email: [madeleine.geiger87@gmail.com](mailto:madeleine.geiger87@gmail.com)

Tesla A. Monson 3

Email: [onsont2@wwu.edu](mailto:onsont2@wwu.edu)

D. Flores 1, 4

Email: [davflor@gmail.com](mailto:davflor@gmail.com)

M. R. Sánchez-Villagra 2 * ORCID: 0000-0001-7587-3648

Email: [m.sanchez@pim.uzh.ch](mailto:m.sanchez@pim.uzh.ch)

**Appendix 1**. - American domestic dog breeds in their different group types, are recognized by the International Canine Kennel Club ([www.internationalcaninekennelclub.com](http://www.internationalcaninekennelclub.com), accessed March 2020). By the nineteenth century, dog fanciers began breeding and trading dogs that were “specialized” for both physical and behavioral traits. With the advent of the Kennel Club in 1873, lineages became standardized by appellation, bloodline, appearance, and behavior. Breeds are the result of pre-zygotic selection – the deliberate mating of preferred animals to perpetuate a specific, observable phenotype. Not listed here are landraces, defined as those resulting from post-zygotic selection; that is, the culling or disposal of unwanted dogs with no direct control over the dog’s reproduction (Lord *et al*. 2016).

| **Breed** | **Country of origin** | **Group** |
| --- | --- | --- |
| Alapaha Blue Blood Bulldog | United States of America | Pinscher and Schnauzer - Molossoid and Swiss Mountain and Cattledogs |
| Alaskan Klee Kai | United States of America | Spitz and primitive types |
| Alaskan Malamute | United States of America | Spitz and primitive types |
| American Akita | United States of America | Spitz and primitive types |
| American Bulldog | United States of America | Pinscher and Schnauzer - Molossoid and Swiss Mountain and Cattledogs |
| American Cocker Spaniel | United States of America | Retrievers - Flushing Dogs - Water Dogs |
| American English Coonhound | United States of America | Scent hounds and related breeds |
| American Eskimo-standard & miniature | United States of America Germany | Spitz and primitive types |
| American Foxhound | United States of America | Scent hounds and related breeds |
| American Hairless Terrier | United States of America | Terriers |
| American Staffordshire Terrier | United States of America | Terriers |
| American Water Spaniel | United States of America | Retrievers - Flushing Dogs - Water Dogs |
| Australian Shepherd | United States of America | Sheepdogs and Cattledogs (except Swiss Cattledogs) |
| Black and Tan Coonhound | United States of America | Scent hounds and related breeds |
| Bluetick Coonhound | United States of America | Scent hounds and related breeds |
| Boston Terrier | United States of America | Companion and Toy Dogs |
| Boykin Spaniel | United States of America | Retrievers - Flushing Dogs - Water Dogs |
| Brazilian Terrier | Brazil | Terriers |
| Canadian Eskimo Dog | Canada | Spitz and primitive types |
| Chesapeake Bay Retriever | United States of America | Retrievers - Flushing Dogs - Water Dogs |
| Chihuahua | Mexico | Companion and Toy Dogs |
| Cimarrón Uruguayo | Uruguay | Pinscher and Schnauzer - Molossoid and Swiss Mountain and Cattledogs |
| Dogo Argentino | Argentina | Pinscher and Schnauzer - Molossoid and Swiss Mountain and Cattledogs |
| Fila Brasileiro | Brazil | Pinscher and Schnauzer - Molossoid and Swiss Mountain and Cattledogs |
| Havanese | Cuba | Companion and Toy Dogs |
| Labrador Retriever | Canada | Retrievers - Flushing Dogs - Water Dogs |
| Longhaired Whippet | United States of America | Sighthounds |
| Lousiana Catahoula Leopard Dog | United States of America | Sheepdogs and Cattledogs (except Swiss Cattledogs) |
| Miniature American Shepherd | United States of America | Sheepdogs and Cattledogs (except Swiss Cattledogs) |
| Newfoundland | Canada | Pinscher and Schnauzer - Molossoid and Swiss Mountain and Cattledogs |
| Nova Scotia Duck Tolling Retriever | Canada | Retrievers - Flushing Dogs - Water Dogs |
| Olde Victorian Bulldogge | United States of America | Pinscher and Schnauzer - Molossoid and Swiss Mountain and Cattledogs |
| Peruvian Hairless Dog | Peru | Spitz and primitive types |
| Redbone Coonhound | United States of America | Scent hounds and related breeds |
| Shiloh Shepherd | United States of America | Sheepdogs and Cattledogs (except Swiss Cattledogs) |
| Siberian Husky | United States of America | Spitz and primitive types |
| Silken Windhound | United States of America | Sighthounds |
| Treeing Tennessee Brindle Coonhound | United States of America | Scent hounds and related breeds |
| Treeing Walker Coonhound | United States of America | Scent hounds and related breeds |
| Xoloitzcuintle | Mexico | Spitz and primitive types |

**Appendix 2. Information related to skulls of pre-Columbian domestic dogs at the Museum für Naturkunde Berlin, Germany.**

The following designations refer to the Fig. 4 of the main text. A, «Zm 355» is housed in the Nehring-Collection (Zoologische Sammlung der Königlichen Landwirtschaftlichen Hochschule zu Berlin) and described as “Inca dog from Ancon, 1889” (as noted in the collection catalogue (1886) and as written on the actual specimen). This specimen most likely does not belong to the collection described by Nehring (1884, see Fig. 3) and Reiss & Stübel (1880-1887, see Fig. 1), which also originated from the graves in Ancon, Peru, but which are assumed to have been destroyed in the World Wars (Ueck 1961).

B, “7031” and C, “7013” are also housed in the Nehring-Collection, but have been found by Prof. Seler in Berlin (as described in the collection files). In contrast to A, these apparently unpublished remains are described as “from an old grave in the district Chalchicomula, close to Jalapazco, Puebla Mexico”. Further, both skulls are described as to be “surely from a time before the conquest of Mexico”

**Appendix 3: Credits to photographs in Fig. 5 of selected dog breeds originating in the Americas**. All photo images are from Shutterstock, photo credit is indicated in parenthesis. Top panel from left to right: Alaskan Malamute, 19 months old (Eric Isselee); Longhaired whippet (MirasWonderland); American bulldog puppy 5 months old (Erik Lam); American cocker spaniel standing with reflection on white background - 3 years old (WilleeCole Photography); three American hairless terriers (Dora Zett). Middle panel: Chesapeake Bay retriever (Erik Lam); American Akita (Jagodka); Silken Windhound (Erik Lam); Siberian Husky 4 years old (Eric Isselee); Miniature American shepherd (MirasWonderland). Bottom panel: young chihuahuas (cynoclub); Xoloitzcuintli, Mexican hairless dog (Masarik); Peruvian hairless dog 1 year old (Rosa Jay); young Bichon Havanese dog (Dorottya Mathe); Brazilian Fox-terrier (venturinirica); Argentinian Dogo (GeptaYs).
